# Supplementary material
Source: MDPI journal article supplement (https://www.mdpi.com/2304-6740/11/7/275)
Supplement: s1 [file s1]

# **Preparation and Properties of three Novel Plasticizer free Di-benzo-18-crown-6 Aldimine derived Lead(II) Ion Selective Electrodes**

**<sup>a</sup>Deneikah T. Jackson, <sup>a</sup>Peter N. Nelson\*, <sup>b</sup>Kimberly Weston, <sup>b</sup>Richard A. Taylor**

<sup>a</sup>Department of Chemistry, The University of the West Indies Mona, Kingston 7, St. Andrew, Jamaica.

<sup>b</sup>Department of Chemistry, The University of the West Indies St. Augustine, Trinidad and Tobago.

## **Supporting Information**

## 1 S1: Bond Distances and Angles

### 1.1 DBAP

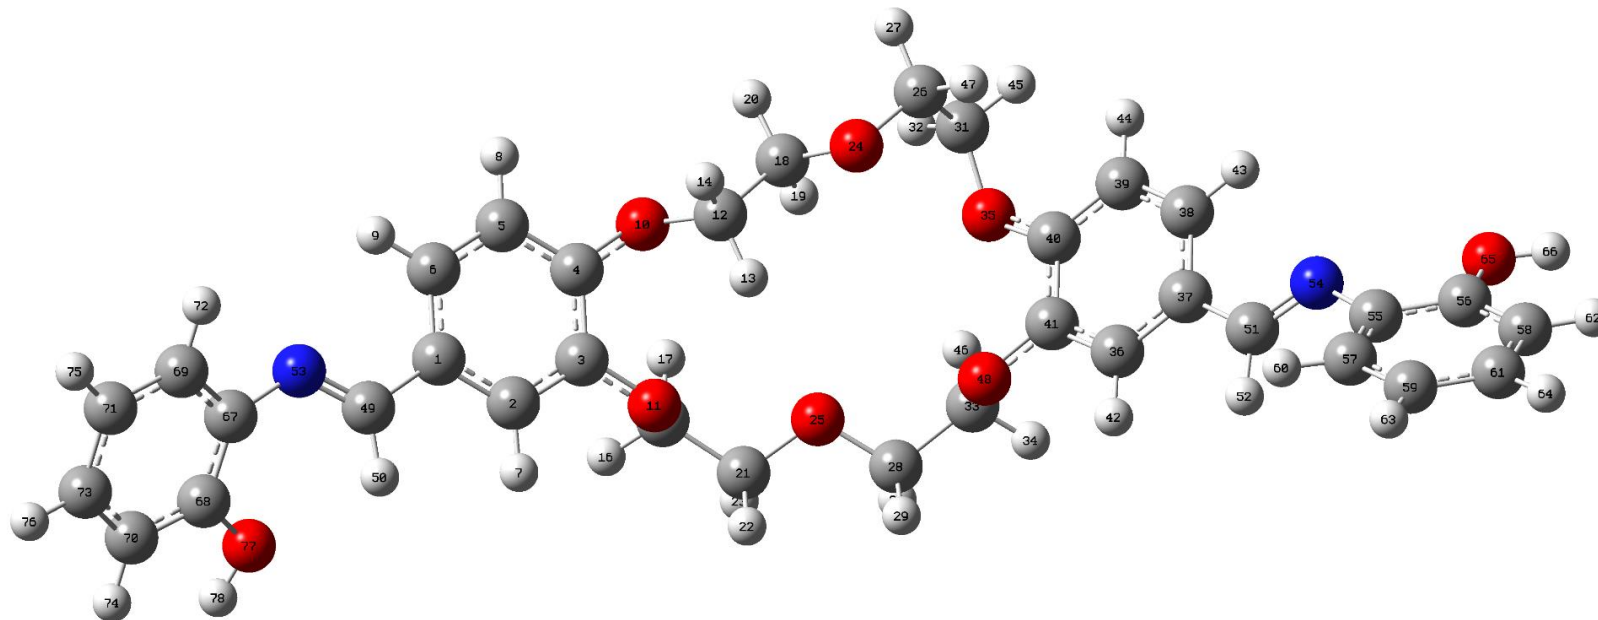

**Figure S1\_a.** Labelled optimized structure of 4,4-Difomyl (2-amino phenol) dibenzo-18-crown-6 (**DBAP**)

**Table S1\_a.** Bond angles and lengths for 4,4-Difomyl (2-aminophenol)dibenzo-18-crown-6 (DBAP) as calculated using DFT/6-311++G(d,p)/RB3LYP

| Bond(d)  | d/ Å   | Bond(d)  | d/ Å   | Bond<br>agles(A) | A/ °     | Bond<br>agles(A) | A/ °     |
|----------|--------|----------|--------|------------------|----------|------------------|----------|
| R(1,2)   | 1.4009 | R(36,37) | 1.4015 | A(2,1,6)         | 118.8349 | A(22,21,23)      | 108.001  |
| R(1,6)   | 1.403  | R(36,41) | 1.3893 | A(2,1,49)        | 119.016  | A(22,21,25)      | 110.6635 |
| R(1,49)  | 1.4674 | R(36,42) | 1.0849 | A(6,1,49)        | 122.1482 | A(23,21,25)      | 110.0539 |
| R(2,3)   | 1.3914 | R(37,38) | 1.4004 | A(1,2,3)         | 121.228  | A(18,24,26)      | 115.7252 |
| R(2,7)   | 1.0851 | R(37,51) | 1.4645 | A(1,2,7)         | 120.5603 | A(21,25,28)      | 112.6375 |
| R(3,4)   | 1.4046 | R(38,39) | 1.3875 | A(3,2,7)         | 118.2117 | A(24,26,27)      | 111.1056 |
| R(3,11)  | 1.3769 | R(38,43) | 1.0828 | A(2,3,4)         | 119.4643 | A(24,26,31)      | 114.6083 |
| R(4,5)   | 1.3981 | R(39,40) | 1.4002 | A(2,3,11)        | 119.3246 | A(24,26,47)      | 105.1126 |
| R(4,10)  | 1.3722 | R(39,44) | 1.0827 | A(4,3,11)        | 121.1808 | A(27,26,31)      | 107.4333 |
| R(5,6)   | 1.3866 | R(40,41) | 1.4098 | A(3,4,5)         | 119.4168 | A(27,26,47)      | 107.9537 |
| R(5,8)   | 1.084  | R(41,48) | 1.3713 | A(3,4,10)        | 121.4616 | A(31,26,47)      | 110.4709 |
| R(6,9)   | 1.0826 | R(49,50) | 1.0925 | A(5,4,10)        | 119.0765 | A(25,28,29)      | 110.4028 |
| R(10,12) | 1.4428 | R(49,53) | 1.2794 | A(4,5,6)         | 120.8463 | A(25,28,30)      | 110.0727 |
| R(11,15) | 1.4383 | R(51,52) | 1.0994 | A(4,5,8)         | 118.0366 | A(25,28,33)      | 110.2561 |
| R(12,13) | 1.0917 | R(51,54) | 1.2769 | A(6,5,8)         | 121.1165 | A(29,28,30)      | 108.0577 |
| R(12,14) | 1.095  | R(53,67) | 1.401  | A(1,6,5)         | 120.1814 | A(29,28,33)      | 109.7575 |
| R(12,18) | 1.5183 | R(54,55) | 1.4    | A(1,6,9)         | 118.8481 | A(30,28,33)      | 108.2383 |
| R(15,16) | 1.0973 | R(55,56) | 1.4115 | A(5,6,9)         | 120.9678 | A(26,31,32)      | 111.1839 |
| R(15,17) | 1.0941 | R(55,57) | 1.4017 | A(4,10,12)       | 115.5052 | A(26,31,35)      | 113.226  |
| R(15,21) | 1.5109 | R(56,58) | 1.3932 | A(3,11,15)       | 114.8214 | A(26,31,45)      | 109.3066 |
| R(18,19) | 1.0957 | R(56,65) | 1.3663 | A(10,12,13)      | 110.5277 | A(32,31,35)      | 103.8829 |
| R(18,20) | 1.1    | R(57,59) | 1.3933 | A(10,12,14)      | 109.4805 | A(32,31,45)      | 107.2431 |
| R(18,24) | 1.4193 | R(57,60) | 1.0842 | A(10,12,18)      | 106.6011 | A(35,31,45)      | 111.7534 |
| R(21,22) | 1.0994 | R(58,61) | 1.3945 | A(13,12,14)      | 109.6009 | A(28,33,34)      | 108.9704 |
| R(21,23) | 1.102  | R(58,62) | 1.0866 | A(13,12,18)      | 110.4187 | A(28,33,46)      | 110.2168 |
| R(21,25) | 1.4159 | R(59,61) | 1.3917 | A(14,12,18)      | 110.1699 | A(28,33,48)      | 108.7539 |
| R(24,26) | 1.4114 | R(59,63) | 1.0836 | A(11,15,16)      | 109.013  | A(34,33,46)      | 109.2109 |
| R(25,28) | 1.4172 | R(61,64) | 1.0838 | A(11,15,17)      | 110.2009 | A(34,33,48)      | 109.1463 |
| R(26,27) | 1.1026 | R(65,66) | 0.9629 | A(11,15,21)      | 109.0268 | A(46,33,48)      | 110.5141 |
| R(26,31) | 1.5309 | R(67,68) | 1.4141 | A(16,15,17)      | 109.0098 | A(31,35,40)      | 120.457  |
| R(26,47) | 1.0913 | R(67,69) | 1.4037 | A(16,15,21)      | 109.1814 | A(37,36,41)      | 121.6034 |
| R(28,29) | 1.0993 | R(68,70) | 1.3945 | A(17,15,21)      | 110.3838 | A(37,36,42)      | 120.6332 |
| R(28,30) | 1.102  | R(68,77) | 1.3735 | A(12,18,19)      | 109.2491 | A(41,36,42)      | 117.753  |
| R(28,33) | 1.5108 | R(69,71) | 1.3894 | A(12,18,20)      | 110.0593 | A(36,37,38)      | 118.6405 |
| R(31,32) | 1.0903 | R(69,72) | 1.0836 | A(12,18,24)      | 106.5671 | A(36,37,51)      | 119.4538 |
| R(31,35) | 1.4283 | R(70,73) | 1.3921 | A(19,18,20)      | 108.7438 | A(38,37,51)      | 121.9054 |
| R(31,45) | 1.0962 | R(70,74) | 1.0869 | A(19,18,24)      | 111.5106 | A(37,38,39)      | 120.3706 |
| R(33,34) | 1.098  | R(71,73) | 1.3934 | A(20,18,24)      | 110.6873 | A(37,38,43)      | 118.9284 |
| R(33,46) | 1.0917 | R(71,75) | 1.0835 | A(15,21,22)      | 109.3156 | A(39,38,43)      | 120.7009 |
| R(33,48) | 1.4349 | R(73,76) | 1.0837 | A(15,21,23)      | 108.5787 | A(38,39,40)      | 120.8269 |
| R(35,40) | 1.3645 | R(77,78) | 0.963  | A(15,21,25)      | 110.1722 | A(38,39,44)      | 119.2711 |

**Table S1\_a.** Continued

| Bond<br>agles(A) | A/ °     | Bond<br>agles(A) | A/ °     |
|------------------|----------|------------------|----------|
| A(54,55,56)      | 118.6992 | A(36,41,40)      | 119.2633 |
| A(54,55,57)      | 123.0222 | A(36,41,48)      | 118.4081 |
| A(56,55,57)      | 118.1598 | A(40,41,48)      | 122.1841 |
| A(55,56,58)      | 120.1828 | A(33,48,41)      | 117.181  |
| A(55,56,65)      | 117.5223 | A(1,49,50)       | 115.505  |
| A(58,56,65)      | 122.2798 | A(1,49,53)       | 121.9037 |
| A(55,57,59)      | 121.5425 | A(50,49,53)      | 122.584  |
| A(55,57,60)      | 118.4241 | A(37,51,52)      | 115.5969 |
| A(59,57,60)      | 119.9873 | A(37,51,54)      | 122.9688 |
| A(56,58,61)      | 120.6676 | A(52,51,54)      | 121.4293 |
| A(56,58,62)      | 119.2589 | A(49,53,67)      | 122.9726 |
| A(61,58,62)      | 120.0734 | A(51,54,55)      | 120.131  |
| A(57,59,61)      | 119.6113 |                  |          |
| A(57,59,63)      | 119.9435 |                  |          |
| A(61,59,63)      | 120.4396 |                  |          |
| A(58,61,59)      | 119.8266 |                  |          |
| A(58,61,64)      | 119.6451 |                  |          |
| A(59,61,64)      | 120.5263 |                  |          |
| A(56,65,66)      | 109.1381 |                  |          |
| A(53,67,68)      | 125.8713 |                  |          |
| A(53,67,69)      | 116.5826 |                  |          |
| A(68,67,69)      | 117.4236 |                  |          |
| A(67,68,70)      | 120.3378 |                  |          |
| A(67,68,77)      | 118.6456 |                  |          |
| A(70,68,77)      | 121.0058 |                  |          |
| A(67,69,71)      | 122.2079 |                  |          |
| A(67,69,72)      | 116.9204 |                  |          |
| A(71,69,72)      | 120.8716 |                  |          |
| A(68,70,73)      | 120.8911 |                  |          |
| A(68,70,74)      | 119.0386 |                  |          |
| A(73,70,74)      | 120.0692 |                  |          |
| A(69,71,73)      | 119.4763 |                  |          |
| A(69,71,75)      | 120.0614 |                  |          |
| A(73,71,75)      | 120.4555 |                  |          |
| A(70,73,71)      | 119.631  |                  |          |
| A(70,73,76)      | 119.6902 |                  |          |
| A(71,73,76)      | 120.6778 |                  |          |
| A(40,39,44)      | 119.9016 |                  |          |
| A(35,40,39)      | 124.1546 |                  |          |
| A(35,40,41)      | 116.533  |                  |          |
| A(39,40,41)      | 119.2853 |                  |          |

## 1.2 DBNAP

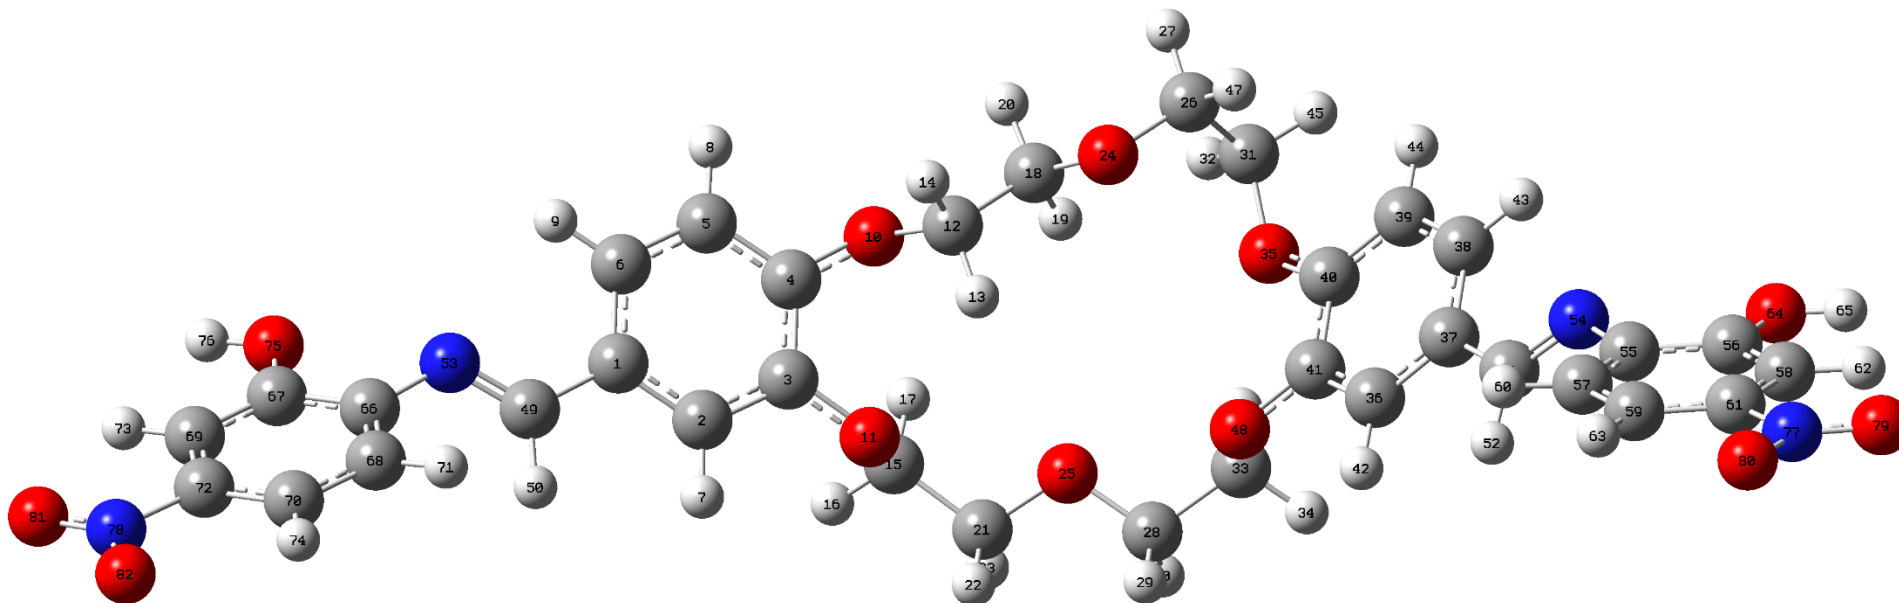

**Figure S1\_b.** Labelled optimized structure of 4,4-Difomyl(2-amino-5-nitrophenol)dibenzo-18-crown-6 (**DBNAP**).

**Table S1\_b.** Bond angles and lengths for 4,4-Difomyl(2-aminophenol)dibenzo-18-crown-6 (DBAP) as calculated using DFT/6-311++G(d,p)/RB3LYP

| Bond(d)  | d/ Å   | Bond(d)  | d/ Å   | Angle(A)    | A/ °     |
|----------|--------|----------|--------|-------------|----------|
| R(1,2)   | 1.4011 | R(36,42) | 1.0848 | A(2,1,6)    | 119.1042 |
| R(1,6)   | 1.4032 | R(37,38) | 1.4009 | A(2,1,49)   | 119.1041 |
| R(1,49)  | 1.4633 | R(37,51) | 1.4605 | A(6,1,49)   | 121.7912 |
| R(2,3)   | 1.391  | R(38,39) | 1.3867 | A(1,2,3)    | 121.1114 |
| R(2,7)   | 1.0851 | R(38,43) | 1.0827 | A(1,2,7)    | 120.7116 |
| R(3,4)   | 1.4059 | R(39,40) | 1.4008 | A(3,2,7)    | 118.177  |
| R(3,11)  | 1.3749 | R(39,44) | 1.0825 | A(2,3,4)    | 119.3729 |
| R(4,5)   | 1.3987 | R(40,41) | 1.4114 | A(2,3,11)   | 119.315  |
| R(4,10)  | 1.3694 | R(41,48) | 1.3697 | A(4,3,11)   | 121.2807 |
| R(5,6)   | 1.3859 | R(49,50) | 1.0989 | A(3,4,5)    | 119.5264 |
| R(5,8)   | 1.0838 | R(49,53) | 1.2774 | A(3,4,10)   | 121.5058 |
| R(6,9)   | 1.0827 | R(51,52) | 1.0989 | A(5,4,10)   | 118.9201 |
| R(10,12) | 1.4444 | R(51,54) | 1.2786 | A(4,5,6)    | 120.8464 |
| R(11,15) | 1.4401 | R(53,66) | 1.3914 | A(4,5,8)    | 118.0357 |
| R(12,13) | 1.0914 | R(54,55) | 1.3905 | A(6,5,8)    | 121.1168 |
| R(12,14) | 1.0947 | R(55,56) | 1.4171 | A(1,6,5)    | 120.0017 |
| R(12,18) | 1.5183 | R(55,57) | 1.4031 | A(1,6,9)    | 119.0132 |
| R(15,16) | 1.097  | R(56,58) | 1.387  | A(5,6,9)    | 120.9837 |
| R(15,17) | 1.0939 | R(56,64) | 1.3613 | A(4,10,12)  | 115.6999 |
| R(15,21) | 1.5106 | R(57,59) | 1.3895 | A(3,11,15)  | 114.9111 |
| R(18,19) | 1.0957 | R(57,60) | 1.0834 | A(10,12,13) | 110.5238 |
| R(18,20) | 1.0997 | R(58,61) | 1.3945 | A(10,12,14) | 109.3927 |
| R(18,24) | 1.4193 | R(58,62) | 1.0831 | A(10,12,18) | 106.5756 |
| R(21,22) | 1.0993 | R(59,61) | 1.3886 | A(13,12,14) | 109.6689 |
| R(21,23) | 1.1018 | R(59,63) | 1.0806 | A(13,12,18) | 110.5075 |
| R(21,25) | 1.4159 | R(61,77) | 1.4702 | A(14,12,18) | 110.1254 |
| R(24,26) | 1.4115 | R(64,65) | 0.9634 | A(11,15,16) | 108.9714 |
| R(25,28) | 1.4175 | R(66,67) | 1.4167 | A(11,15,17) | 110.1542 |
| R(26,27) | 1.1022 | R(66,68) | 1.4027 | A(11,15,21) | 108.9878 |
| R(26,31) | 1.5311 | R(67,69) | 1.3873 | A(16,15,17) | 109.0526 |
| R(26,47) | 1.0912 | R(67,75) | 1.3608 | A(16,15,21) | 109.2128 |
| R(28,29) | 1.0992 | R(68,70) | 1.3897 | A(17,15,21) | 110.4363 |
| R(28,30) | 1.1018 | R(68,71) | 1.0834 | A(12,18,19) | 109.2873 |
| R(28,33) | 1.5105 | R(69,72) | 1.3943 | A(12,18,20) | 110.0863 |
| R(31,32) | 1.0901 | R(69,73) | 1.083  | A(12,18,24) | 106.4364 |
| R(31,35) | 1.4297 | R(70,72) | 1.3885 | A(19,18,20) | 108.7393 |
| R(31,45) | 1.0959 | R(70,74) | 1.0806 | A(19,18,24) | 111.5724 |
| R(33,34) | 1.0977 | R(72,78) | 1.4709 | A(20,18,24) | 110.695  |
| R(33,46) | 1.0915 | R(75,76) | 0.9634 | A(15,21,22) | 109.3453 |
| R(33,48) | 1.4361 | R(77,79) | 1.228  | A(15,21,23) | 108.5357 |
| R(35,40) | 1.3611 | R(77,80) | 1.2262 | A(15,21,25) | 110.1113 |
| R(36,37) | 1.4023 | R(78,81) | 1.2277 | A(22,21,23) | 108.0022 |
| R(36,41) | 1.3884 | R(78,82) | 1.226  | A(22,21,25) | 110.6813 |

**Table S1\_b.** Continued

| Angle(A)    | A/ °     | Angle(A)      | A/ °     | Angle(A)      | A/ °     |
|-------------|----------|---------------|----------|---------------|----------|
| A(23,21,25) | 110.1091 | A(36,41,40)   | 119.2111 | 0 A(68,70,72) | 118.2292 |
| A(18,24,26) | 115.7592 | A(36,41,48)   | 118.4307 | 1 A(68,70,74) | 121.7478 |
| A(21,25,28) | 112.6383 | A(40,41,48)   | 122.1991 | 2 A(72,70,74) | 120.0201 |
| A(24,26,27) | 111.1794 | A(33,48,41)   | 117.3627 | 3 A(69,72,70) | 121.9878 |
| A(24,26,31) | 114.4635 | A(1,49,50)    | 115.772  | 4 A(69,72,78) | 118.5541 |
| A(24,26,47) | 105.0905 | A(1,49,53)    | 123.0093 | 5 A(70,72,78) | 119.4578 |
| A(27,26,31) | 107.5098 | A(50,49,53)   | 121.2127 | 6 A(67,75,76) | 109.7339 |
| A(27,26,47) | 107.9263 | A(37,51,52)   | 115.7336 | 7 A(61,77,79) | 117.7733 |
| A(31,26,47) | 110.5177 | A(37,51,54)   | 123.1248 | 8 A(61,77,80) | 117.8764 |
| A(25,28,29) | 110.3992 | A(52,51,54)   | 121.1347 | 9 A(79,77,80) | 124.3503 |
| A(25,28,30) | 110.1136 | A(49,53,66)   | 120.6868 | 0 A(72,78,81) | 117.7556 |
| A(25,28,33) | 110.1853 | A(51,54,55)   | 120.6794 | 1 A(72,78,82) | 117.853  |
| A(29,28,30) | 108.0692 | A(54,55,56)   | 118.6797 | 2 A(81,78,82) | 124.3914 |
| A(29,28,33) | 109.7902 | 0 A(54,55,57) | 122.7602 |               |          |
| A(30,28,33) | 108.2293 | 1 A(56,55,57) | 118.4229 |               |          |
| A(26,31,32) | 111.2592 | 2 A(55,56,58) | 120.2694 |               |          |
| A(26,31,35) | 113.0378 | 3 A(55,56,64) | 117.1734 |               |          |
| A(26,31,45) | 109.4743 | 4 A(58,56,64) | 122.5424 |               |          |
| A(32,31,35) | 103.8156 | 5 A(55,57,59) | 121.7451 |               |          |
| A(32,31,45) | 107.2765 | 6 A(55,57,60) | 118.5123 |               |          |
| A(35,31,45) | 111.7321 | 7 A(59,57,60) | 119.7067 |               |          |
| A(28,33,34) | 109.0145 | 8 A(56,58,61) | 119.3617 |               |          |
| A(28,33,46) | 110.2423 | 9 A(56,58,62) | 121.3478 |               |          |
| A(28,33,48) | 108.6813 | 0 A(61,58,62) | 119.2905 |               |          |
| A(34,33,46) | 109.2633 | 1 A(57,59,61) | 118.2491 |               |          |
| A(34,33,48) | 109.1209 | 2 A(57,59,63) | 121.7397 |               |          |
| A(46,33,48) | 110.49   | 3 A(61,59,63) | 120.0082 |               |          |
| A(31,35,40) | 120.6824 | 4 A(58,61,59) | 121.945  |               |          |
| A(37,36,41) | 121.5441 | 5 A(58,61,77) | 118.5738 |               |          |
| A(37,36,42) | 120.6811 | 6 A(59,61,77) | 119.4809 |               |          |
| A(41,36,42) | 117.7634 | 7 A(56,64,65) | 109.6678 |               |          |
| A(36,37,38) | 118.7654 | 8 A(53,66,67) | 118.6536 |               |          |
| A(36,37,51) | 119.3437 | 9 A(53,66,68) | 122.7074 |               |          |
| A(38,37,51) | 121.8909 | 0 A(67,66,68) | 118.5003 |               |          |
| A(37,38,39) | 120.3112 | 1 A(66,67,69) | 120.2263 |               |          |
| A(37,38,43) | 119.0582 | 2 A(66,67,75) | 117.162  |               |          |
| A(39,38,43) | 120.6304 | 3 A(69,67,75) | 122.5963 |               |          |
| A(38,39,40) | 120.7984 | 4 A(66,68,70) | 121.7064 |               |          |
| A(38,39,44) | 119.2769 | 5 A(66,68,71) | 118.5365 |               |          |
| A(40,39,44) | 119.9244 | 6 A(70,68,71) | 119.7201 |               |          |
| A(35,40,39) | 124.2107 | 7 A(67,69,72) | 119.343  |               |          |
| A(35,40,41) | 116.4069 | 8 A(67,69,73) | 121.3533 |               |          |
| A(39,40,41) | 119.3583 | 9 A(72,69,73) | 119.3036 |               |          |

### 1.3 DBMAP

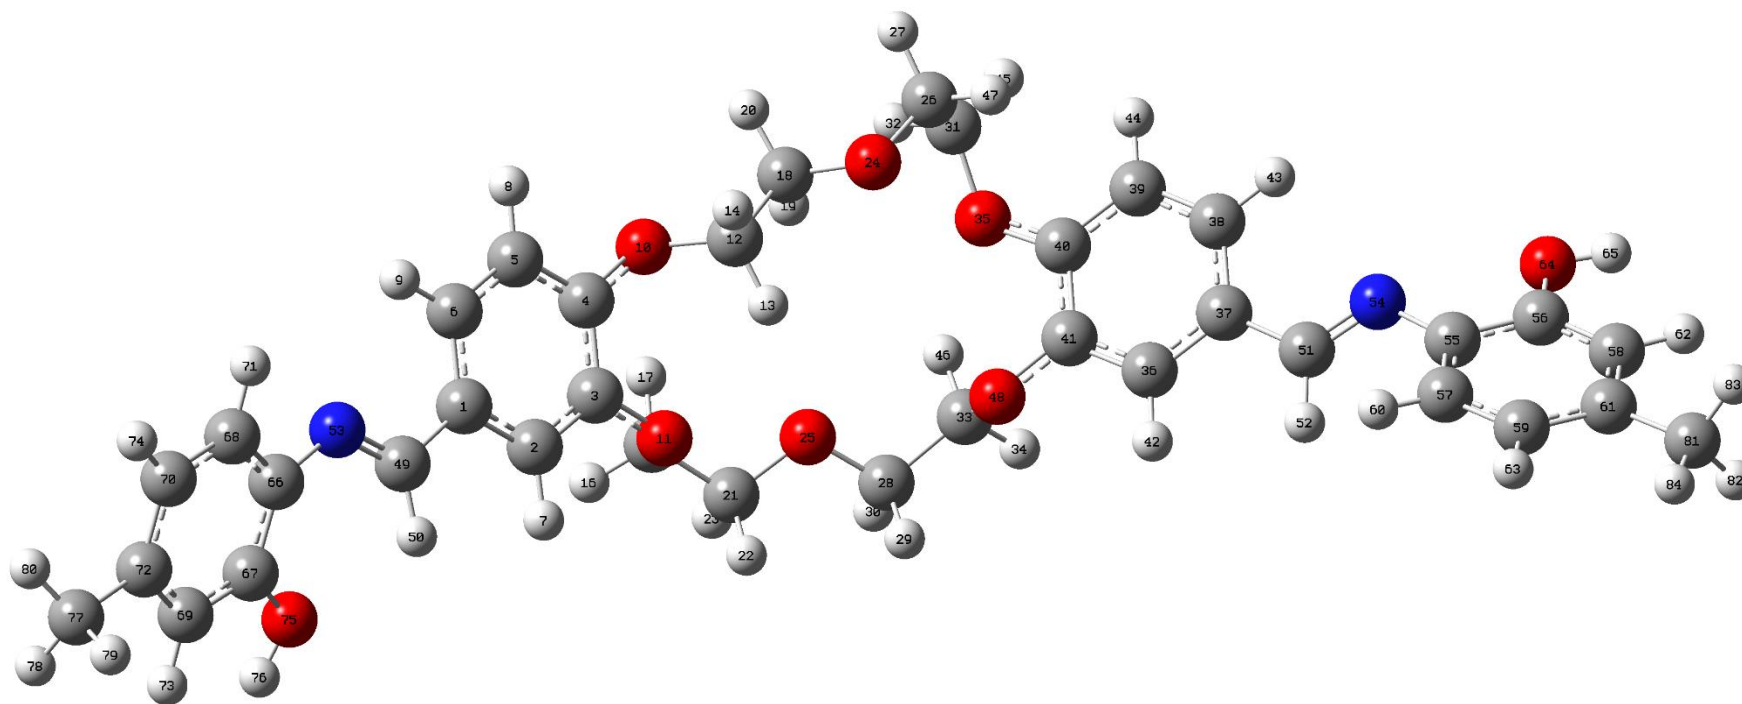

**Figure S1\_c.** Labelled optimized structure of 4,4-Difomyl(2-amino-5-methylphenol)dibenzo-18-crown-6 (**DBMAP**)



**Table S1\_c.** Bond angles and lengths for 4,4-Difomyl(2-amino-5-methylphenol)dibenzo-18-crown-6 (**DBMAP**) as calculated using DFT/6-311++G(d,p)/RB3LYP

| Bond(d)  | d/ Å   | Bond(d)  | d/ Å   | Bond(d)  | d/ Å   | Angle(A)    | A/ °     |
|----------|--------|----------|--------|----------|--------|-------------|----------|
| R(1,2)   | 1.4012 | R(36,41) | 1.3894 | R(77,80) | 1.0921 | A(2,1,6)    | 118.7627 |
| R(1,6)   | 1.4032 | R(36,42) | 1.0849 | R(81,82) | 1.0946 | A(2,1,49)   | 119.0101 |
| R(1,49)  | 1.4679 | R(37,38) | 1.4005 | R(81,83) | 1.0949 | A(6,1,49)   | 122.2264 |
| R(2,3)   | 1.3914 | R(37,51) | 1.4647 | R(81,84) | 1.0917 | A(1,2,3)    | 121.2579 |
| R(2,7)   | 1.0851 | R(38,39) | 1.3876 |          |        | A(1,2,7)    | 120.5387 |
| R(3,4)   | 1.4044 | R(38,43) | 1.0828 |          |        | A(3,2,7)    | 118.2035 |
| R(3,11)  | 1.3772 | R(39,40) | 1.4001 |          |        | A(2,3,4)    | 119.4845 |
| R(4,5)   | 1.398  | R(39,44) | 1.0827 |          |        | A(2,3,11)   | 119.3227 |
| R(4,10)  | 1.3727 | R(40,41) | 1.4096 |          |        | A(4,3,11)   | 121.1612 |
| R(5,6)   | 1.3867 | R(41,48) | 1.3715 |          |        | A(3,4,5)    | 119.3914 |
| R(5,8)   | 1.0841 | R(49,50) | 1.0915 |          |        | A(3,4,10)   | 121.4425 |
| R(6,9)   | 1.0826 | R(49,53) | 1.2806 |          |        | A(5,4,10)   | 119.1203 |
| R(10,12) | 1.4425 | R(51,52) | 1.0995 |          |        | A(4,5,6)    | 120.8519 |
| R(11,15) | 1.438  | R(51,54) | 1.277  |          |        | A(4,5,8)    | 118.0376 |
| R(12,13) | 1.0917 | R(53,66) | 1.3997 |          |        | A(6,5,8)    | 121.1099 |
| R(12,14) | 1.095  | R(54,55) | 1.4    |          |        | A(1,6,5)    | 120.2232 |
| R(12,18) | 1.5183 | R(55,56) | 1.4118 |          |        | A(1,6,9)    | 118.8062 |
| R(15,16) | 1.0973 | R(55,57) | 1.3994 |          |        | A(5,6,9)    | 120.9679 |
| R(15,17) | 1.0941 | R(56,58) | 1.3914 |          |        | A(4,10,12)  | 115.4589 |
| R(15,21) | 1.511  | R(56,64) | 1.3664 |          |        | A(3,11,15)  | 114.8175 |
| R(18,19) | 1.0957 | R(57,59) | 1.3938 |          |        | A(10,12,13) | 110.5261 |
| R(18,20) | 1.1    | R(57,60) | 1.0842 |          |        | A(10,12,14) | 109.4993 |
| R(18,24) | 1.4194 | R(58,61) | 1.4003 |          |        | A(10,12,18) | 106.6132 |
| R(21,22) | 1.0994 | R(58,62) | 1.088  |          |        | A(13,12,14) | 109.587  |
| R(21,23) | 1.102  | R(59,61) | 1.395  |          |        | A(13,12,18) | 110.398  |
| R(21,25) | 1.4159 | R(59,63) | 1.0846 |          |        | A(14,12,18) | 110.1763 |
| R(24,26) | 1.4114 | R(61,81) | 1.5095 |          |        | A(11,15,16) | 109.0234 |
| R(25,28) | 1.4171 | R(64,65) | 0.9629 |          |        | A(11,15,17) | 110.208  |
| R(26,27) | 1.1026 | R(66,67) | 1.4143 |          |        | A(11,15,21) | 109.0265 |
| R(26,31) | 1.5309 | R(66,68) | 1.4036 |          |        | A(16,15,17) | 109.0057 |
| R(26,47) | 1.0913 | R(67,69) | 1.3938 |          |        | A(16,15,21) | 109.1746 |
| R(28,29) | 1.0993 | R(67,75) | 1.3731 |          |        | A(17,15,21) | 110.3776 |
| R(28,30) | 1.1021 | R(68,70) | 1.3882 |          |        | A(12,18,19) | 109.2468 |
| R(28,33) | 1.5108 | R(68,71) | 1.0836 |          |        | A(12,18,20) | 110.0588 |
| R(31,32) | 1.0903 | R(69,72) | 1.3967 |          |        | A(12,18,24) | 106.5848 |
| R(31,35) | 1.4282 | R(69,73) | 1.0882 |          |        | A(19,18,20) | 108.7436 |
| R(31,45) | 1.0962 | R(70,72) | 1.398  |          |        | A(19,18,24) | 111.5008 |
| R(33,34) | 1.0981 | R(70,74) | 1.0845 |          |        | A(20,18,24) | 110.6827 |
| R(33,46) | 1.0918 | R(72,77) | 1.5088 |          |        | A(15,21,22) | 109.3078 |
| R(33,48) | 1.4347 | R(75,76) | 0.9632 |          |        | A(15,21,23) | 108.5924 |
| R(35,40) | 1.3649 | R(77,78) | 1.093  |          |        | A(15,21,25) | 110.1776 |
| R(36,37) | 1.4014 | R(77,79) | 1.0958 |          |        | A(22,21,23) | 108.002  |

**Table S1\_c.** continued

| Angle(A)    | A/ °     |
|-------------|----------|
| A(22,21,25) | 110.6582 |
| A(23,21,25) | 110.0472 |
| A(18,24,26) | 115.7221 |
| A(21,25,28) | 112.6456 |
| A(24,26,27) | 111.0959 |
| A(24,26,31) | 114.6345 |
| A(24,26,47) | 105.1166 |
| A(27,26,31) | 107.417  |
| A(27,26,47) | 107.9554 |
| A(31,26,47) | 110.4645 |
| A(25,28,29) | 110.4012 |
| A(25,28,30) | 110.0762 |
| A(25,28,33) | 110.2579 |
| A(29,28,30) | 108.0537 |
| A(29,28,33) | 109.7589 |
| A(30,28,33) | 108.2371 |
| A(26,31,32) | 111.1755 |
| A(26,31,35) | 113.2618 |
| A(26,31,45) | 109.2776 |
| A(32,31,35) | 103.8893 |

## 2 S2: Molecular orbital surfaces

**Table S2.** Molecular orbital surface for 4,4-Difomyl(2-amino-5-methylphenol) dibenzo-18-crown-6 (**DBMAP**) and 4,4-Difomyl(2-amino-5-nitrophenol)dibenzo-18-crown-6 (**DBNAP**), calculated based on DFT/6-311++G(d,p)/RB3LYP

| DBNAP                                                                                             | DBMAP                                                                                              |
|---------------------------------------------------------------------------------------------------|----------------------------------------------------------------------------------------------------|
| 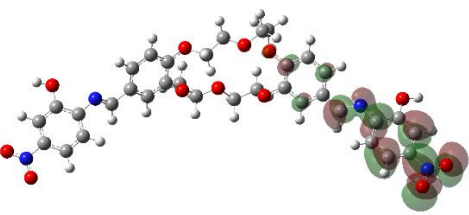 <p>LUMO+1</p>   |  <p>LUMO+1</p>   |
|  <p>LUMO</p>    |  <p>LUMO</p>    |
|  <p>HOMO</p>   |  <p>HOMO</p>   |
|  <p>HOMO-1</p> |  <p>HOMO-1</p> |

### 3 S1: Infrared spectra of the lead complexes

#### 3.1 DBNAP

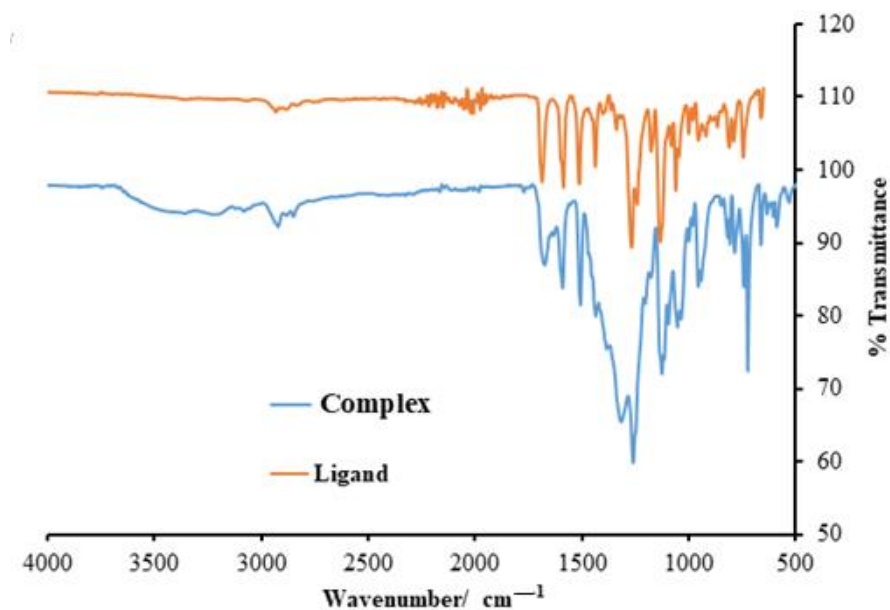

**Figure S1\_d.** Solid state Infrared spectra of 4,4-Difomyl(2-amino-5-nitrophenol) dibenzo-18-crown-6 (DBNAP) and its lead complex, collected on powdered samples at ambient temperature.

#### 3.2 DBAP

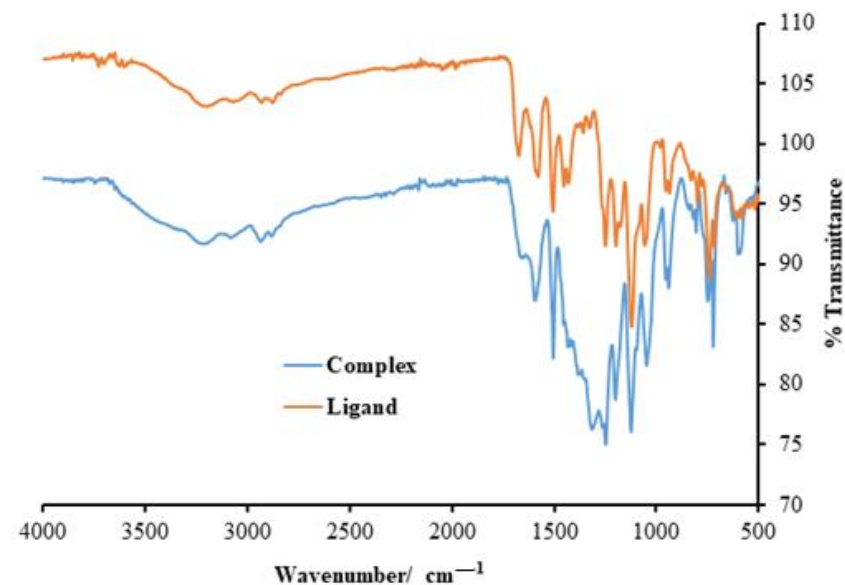

**Figure S1\_e.** Solid state Infrared spectra of 4,4-Difomyl(2-aminophenol) dibenzo-18-crown-6 (DBAP) and its lead complex, collected on powdered samples at ambient temperature.

### 3.3 DBMAP

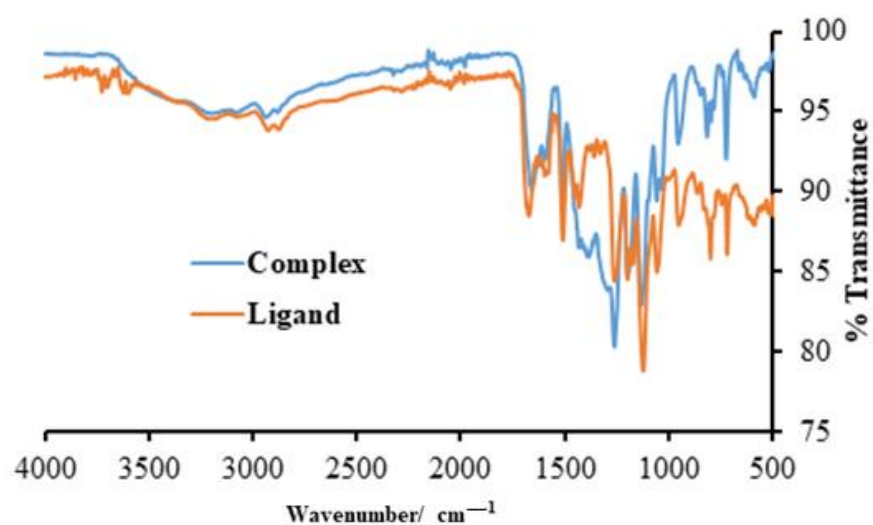

**Figure S1\_f.** Solid state Infrared spectra of 4,4-Difomyl(2-amino-5-methylphenol) dibenzo-18-crown-6 (**DBMAP**) and its lead complex, collected on powdered samples at ambient temperature.

#### 4 S2: Electrostatic Potentials of radical cation

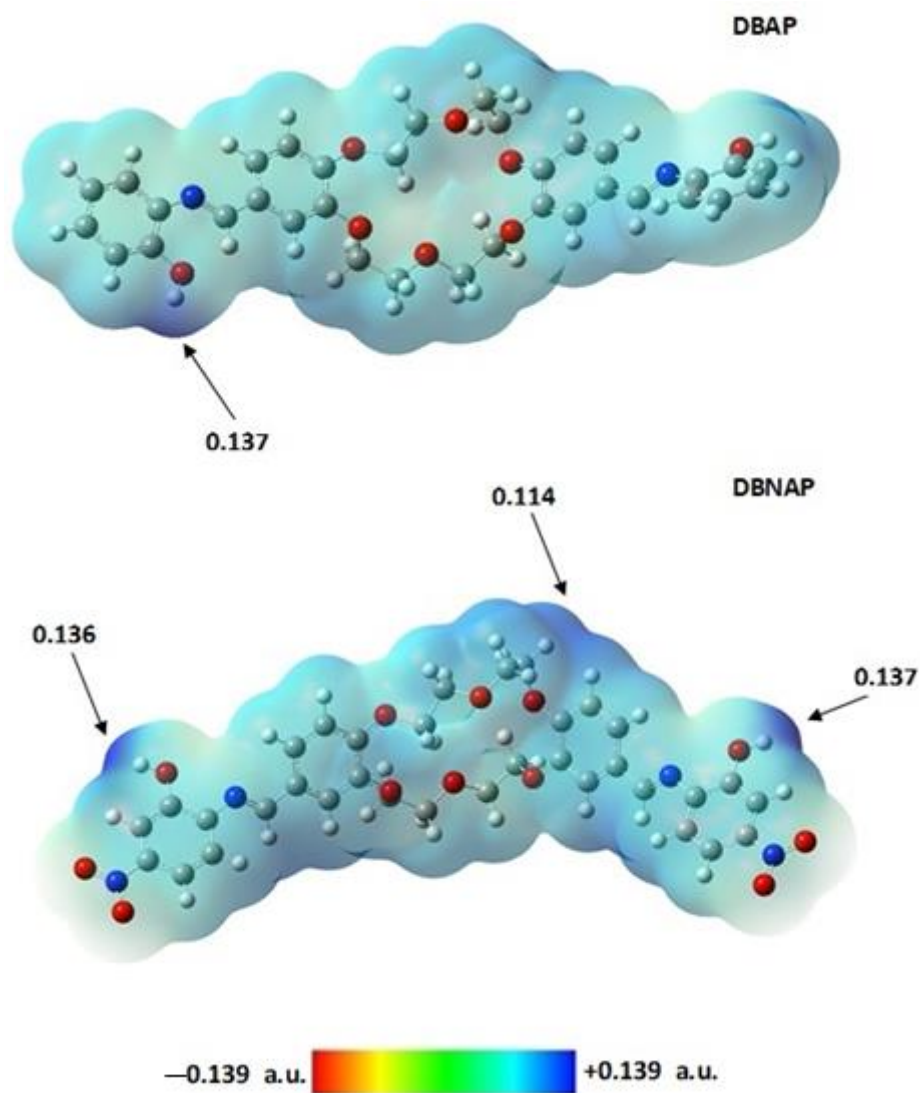

**Figure S2.** Calculated Electrostatic potential map surfaces (Isoval. 0.0040) for 4,4-Difomyl (2-aminophenol)dibenzo-18-crown-6 (**DBAP**) and 4,4-Difomyl(2-amino-5-nitrophenol)dibenzo-18-crown-6 (**DBNAP**) radical cations, calculated based on DFT/6-311++G(d,p)/RB3LYP.

## 5 S3: Cyclic voltammogram, Square wave Cyclic voltammogram, multiple cycle for

### 5.1 DBMAP

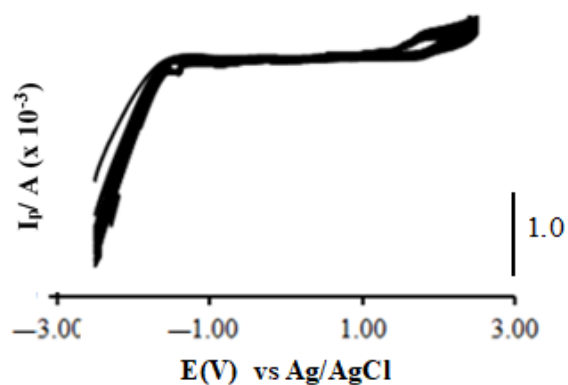

### 5.2 DBNAP

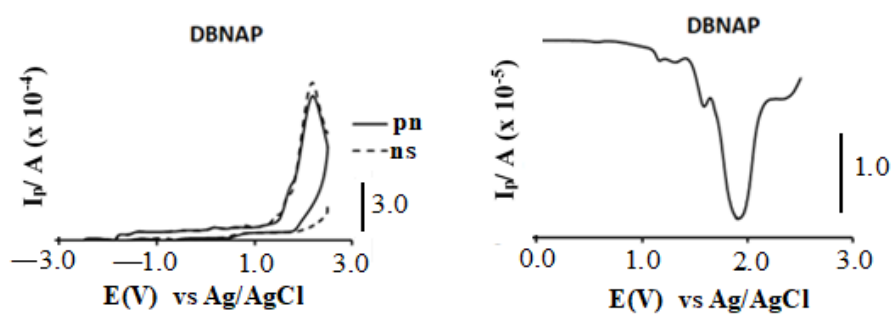

**Figure S3\_a.** Multi-cycle voltammogram for 4,4-Difomyl(2-amino-5-methylphenol)dibenzo-18-crown-6 (**DBMAP**), collected during polymerization. Positive (ps) and negative (ns) cyclic voltammetric scans and square wave voltammogram for 4,4-Difomyl(2-amino-5-nitrophenol)dibenzo-18-crown-6 (**DBNAP**).

### 5.3 DBAP

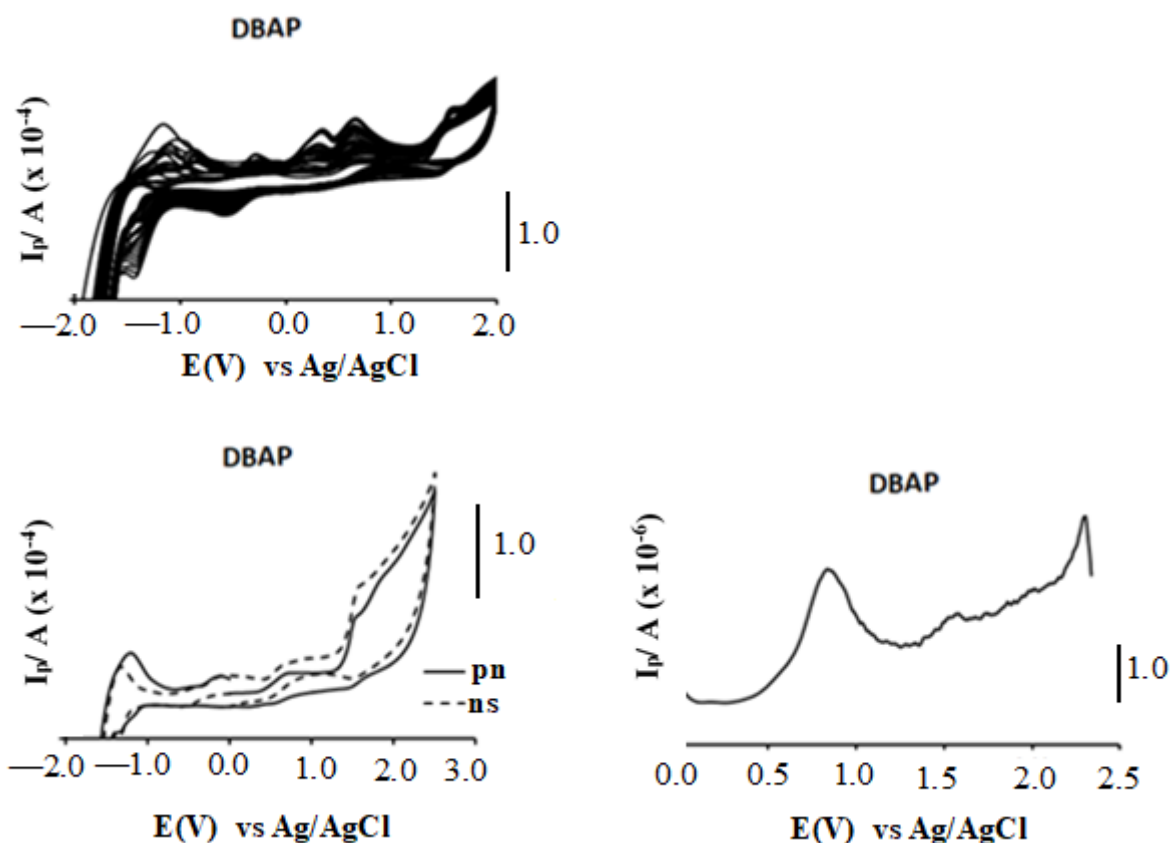

**Figure S3\_b.** Multi-cycle (30 scans) voltammogram, collected during polymerization. Positive (ps) and negative (ns) cyclic voltammetric scans and square wave voltammogram for 4,4-Difomyl(2-aminophenol)dibenzo-18-crown-6 (**DBAP**).

### 6 S4: DPASV scans for the bare electrode in different concentrations of lead

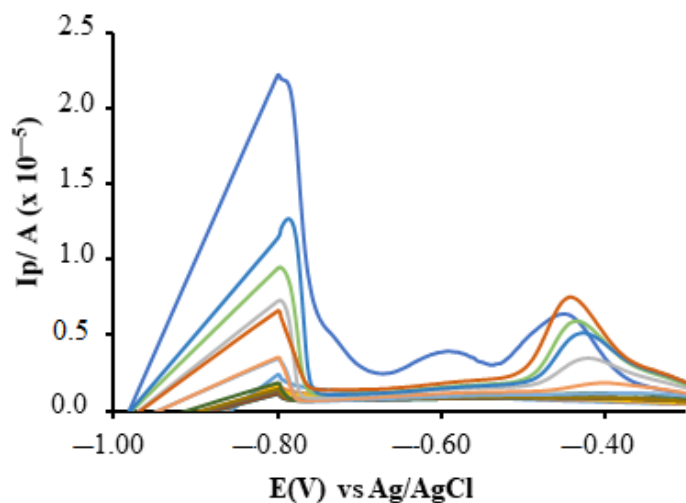

**Figure S4.** Differential pulse anodic stripping voltammetry (DPASV) curves using the bare electrode (platinum) at different lead concentrations (60  $\mu$ L per-addition,  $[Pb^{2+}] = 100 \mu M$ ).



## 7 S1: $^1\text{H}$ and $^{13}\text{C}$ -NMR

### 7.1 DBAP

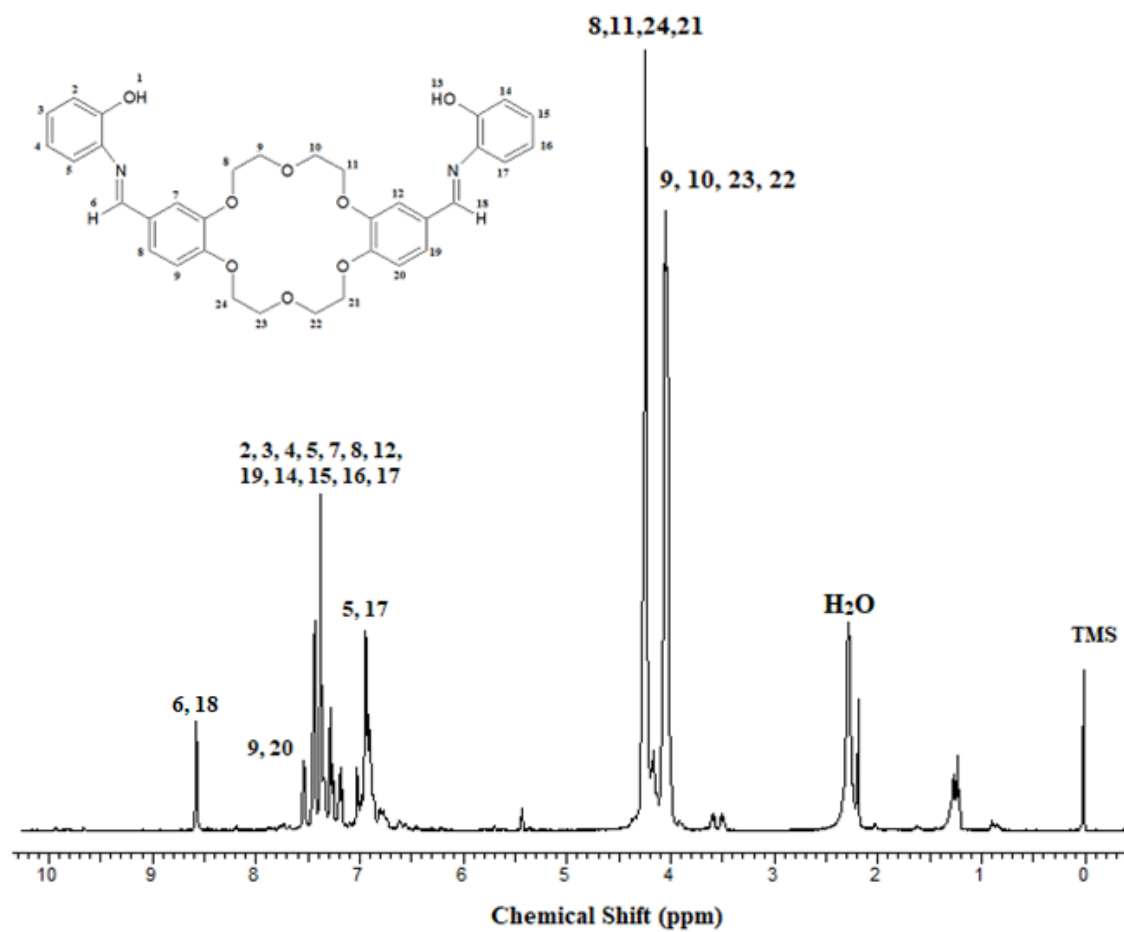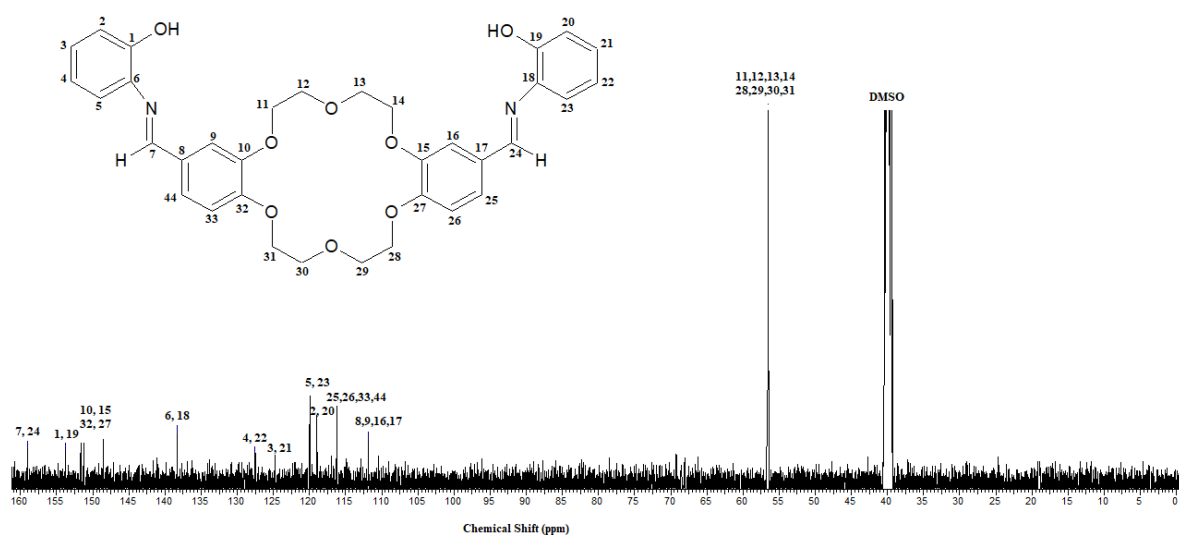

**Figure S5\_a.** Proton and Carbon-13 NMR spectra of 4,4-Difomyl(2-aminophenol)dibenzo-18-crown-6 (DBAP), collected in  $\text{d}_6\text{-DMSO}$ .

## 7.2 2A5NP

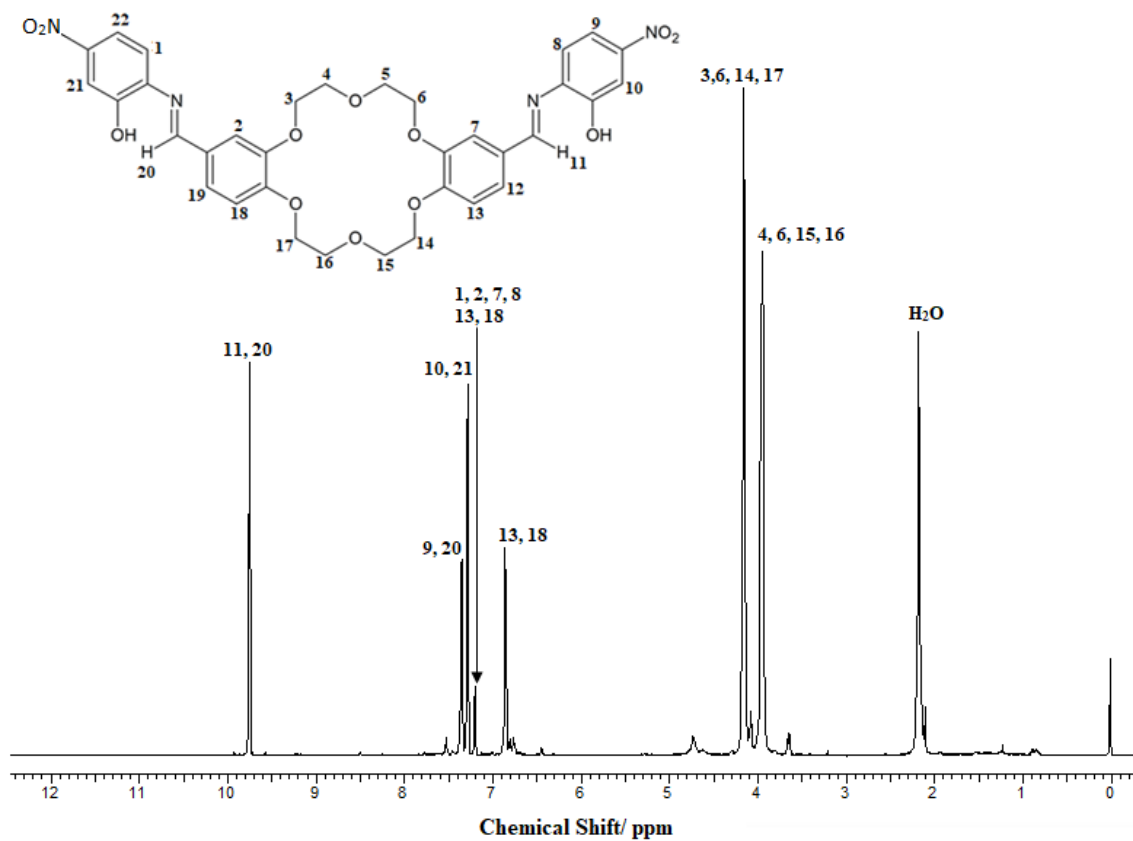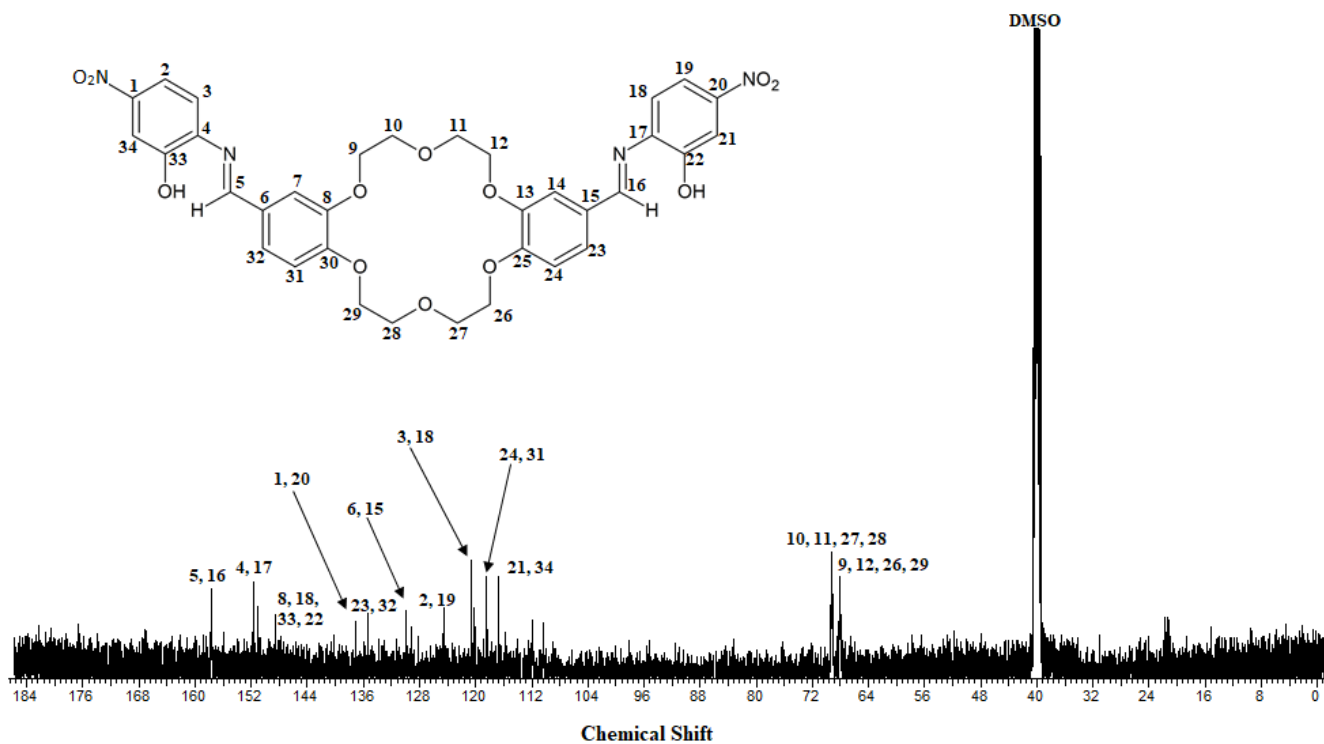

**Figure S5\_b.** Proton and Carbon-13 NMR spectra of *4,4-Difomyl(2-amino-5-nitrophenol)dibenzo-18-crown-6 (DBNAP)*, collected in  $d^6$ -DMSO.

### 7.3 2A5MP

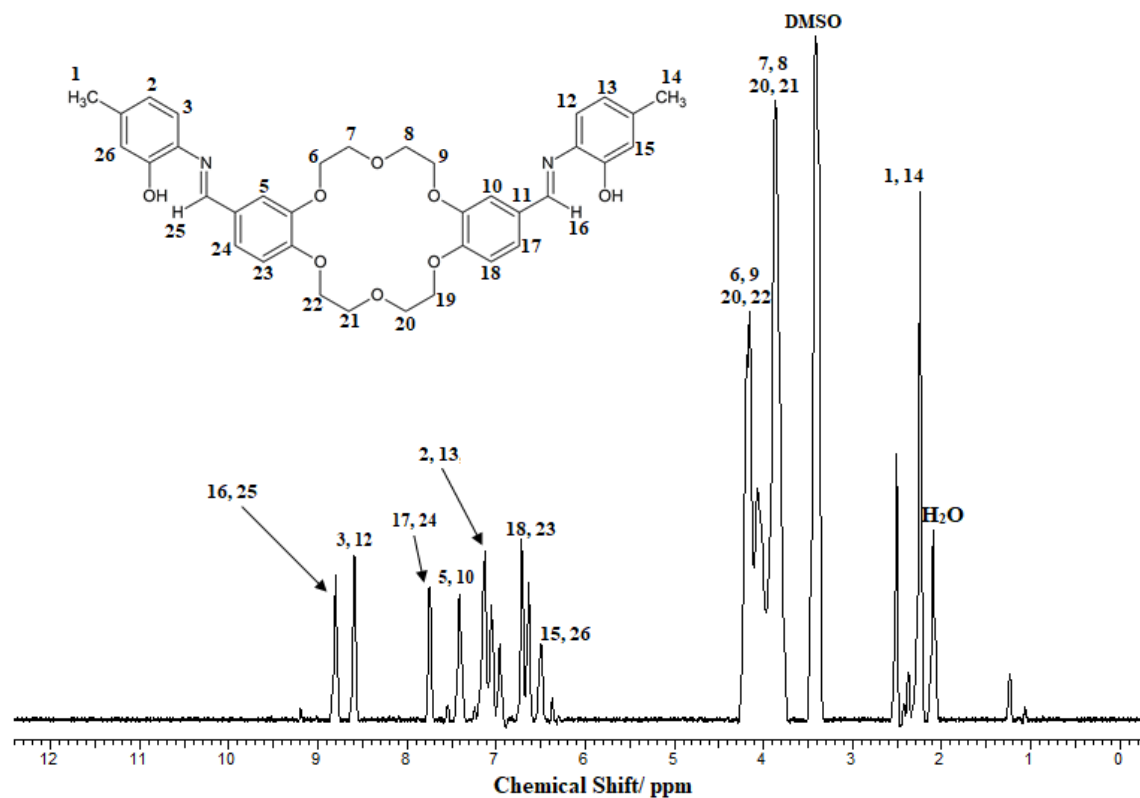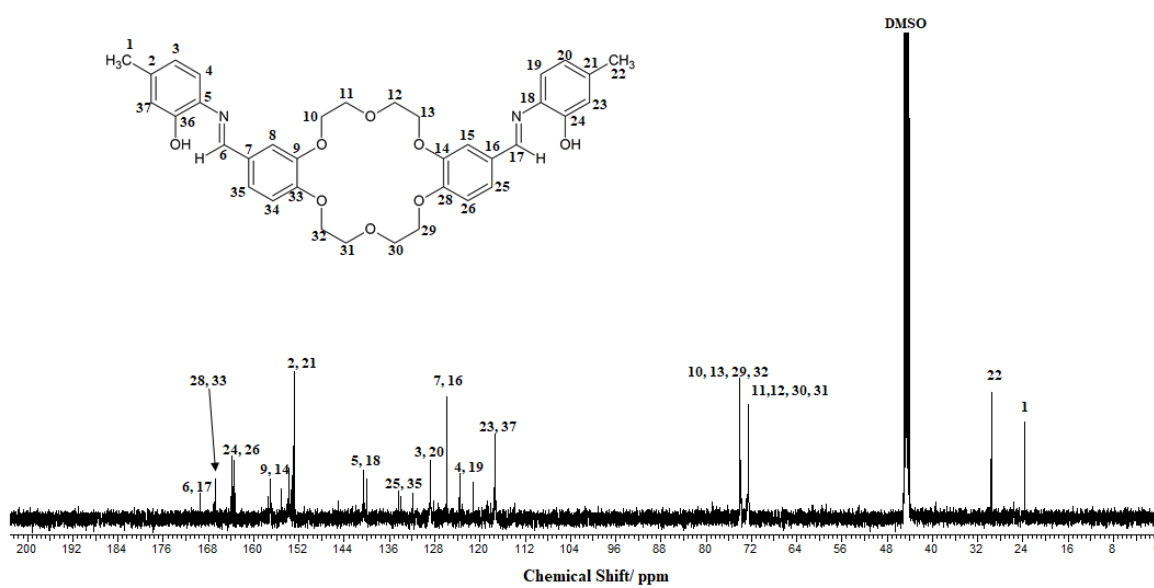

**Figure S5\_c.** Proton and Carbon-13 NMR spectra of *4,4-Difomyl(2-amino-5-methylphenol)dibenzo-18-crown-6 (DBMAP)*, collected in  $d^6$ -DMSO.

## 8 S2: CH-Analysis

**Table S3.** Carbon and hydrogen composition analysis for 4,4-Difomyl 2-aminophenol) dibenzo-18-crown-6 (**DBAP**), 4,4-Difomyl(2-amino-5-methylphenol)dibenzo-18-crown-6 (**DBMAP**) and 4,4-Difomyl(2-amino-5-nitrophenol)dibenzo-18-crown-6 (**DBNAP**).

| Compound                 | %C (Expt./ Theory) | %H (Expt./ Theory) |
|--------------------------|--------------------|--------------------|
| DBAP.1.5H <sub>2</sub> O | 65.25/65.27        | 5.70/5.96          |
| DBMAP.H <sub>2</sub> O   | 67.01/67.07        | 6.22/6.25          |
| DBNAP.H <sub>2</sub> O   | 57.70/57.79        | 4.82/4.85          |
